# Supplementary material for: Clinical Pharmacology of Fast-Acting Insulin Aspart Versus Insulin Aspart Measured as Free or Total Insulin Aspart and the Relation to Anti-Insulin Aspart Antibody Levels in Subjects with Type 1 Diabetes Mellitus
Source: Springer Nature journal article supplement (doi:10.1007/s40262-018-0718-6), 2018-11-07
Supplement: MOESM1 [file 16257190]

## **Electronic supplementary material**

### **Clinical Pharmacokinetics**

#### **Clinical Pharmacology of Fast-Acting Insulin Aspart Versus Insulin Aspart Measured as Free or Total Insulin Aspart and the Relation to Anti-Insulin Aspart Antibody Levels in Subjects with Type 1 Diabetes Mellitus**

Hanne Haahr<sup>1</sup>, Thomas R. Pieber<sup>2</sup>, Chantal Mathieu<sup>3</sup>, Theis Gondolf<sup>1</sup>, Masanari Shiramoto<sup>4</sup>, Lars Erichsen<sup>1</sup>, Tim Heise<sup>5</sup>

<sup>1</sup>Novo Nordisk A/S, Vandtårnsvej 114, 2860 Søborg, Denmark

<sup>2</sup>Department of Internal Medicine, Medical University of Graz, Auenbruggerplatz 15, 8036 Graz, Austria

<sup>3</sup>Clinical and Experimental Endocrinology, University Hospital Leuven, KU Leuven, UZ Herestraat 49, Box 902, 3000 Leuven, Belgium

<sup>4</sup>SOUSEIKAI, Hakata Clinic, 6-18 Tenyamachi, Hakata-ku, Fukuoka 812-0025, Japan

<sup>5</sup>Profil, Hellersbergstrasse 9, 41460 Neuss, Germany

#### **Corresponding author:**

Hanne Haahr

E-mail: [hhaa@novonordisk.com](mailto:hhaa@novonordisk.com)

**Table S1** Trial information

| Trial no. | Reference                | Trial registration no. | N               | Key inclusion criteria      |                   |            |                       |
|-----------|--------------------------|------------------------|-----------------|-----------------------------|-------------------|------------|-----------------------|
|           |                          |                        |                 | BMI<br>(kg/m <sup>2</sup> ) | HbA <sub>1c</sub> |            | C-peptide<br>(nmol/L) |
|           |                          |                        |                 |                             | (%)               | (mmol/mol) |                       |
| 1         | Heise et al. [1]         | NCT01618188            | 51              | 18.0-28.0                   | ≤8.5%             | 69         | ≤0.3                  |
| 2         | Heise et al. [2]         | NCT02003677            | 44 <sup>a</sup> | 18.5-28.0                   | ≤9.5%             | 80         | ≤0.3                  |
| 3         | Shiramoto et al. [3]     | NCT01934712            | 40              | 18.5-28.0                   | ≤9.0%             | 75         | ≤0.3                  |
| 4         | Basu et al. [4]          | NCT02568280            | 40              | 18.5-28.0                   | ≤8.5%             | 69         | ≤0.3                  |
| 5         | Russell-Jones et al. [5] | NCT01831765            | 1040            | ≤35.0                       | 7.0-9.5%          | 53-80      | ND                    |

BMI, body mass index; HbA<sub>1c</sub>, glycosylated haemoglobin; N, number of subjects; ND, not determined

<sup>a</sup> Only those subjects where total insulin aspart was measured (i.e. the first 44 randomised subjects) are included for Trial 2

**Table S2** Pharmacokinetic blood sampling scheme in the clinical pharmacology trials

| Nominal time       | Trial 1 | Trial 2 | Trial 3 | Trial 4 |
|--------------------|---------|---------|---------|---------|
| 00:00 <sup>a</sup> | X       | X       | X       | X       |
| 00:02              | X       | X       | X       |         |
| 00:04              | X       | X       | X       |         |
| 00:05              |         |         |         | X       |
| 00:06              | X       | X       | X       |         |
| 00:08              | X       | X       | X       |         |
| 00:10              | X       | X       | X       | X       |
| 00:12              | X       | X       | X       |         |
| 00:14              | X       | X       | X       |         |
| 00:15              |         |         |         | X       |
| 00:16              | X       | X       | X       |         |
| 00:18              | X       | X       | X       |         |
| 00:20              | X       | X       | X       | X       |
| 00:25              | X       | X       | X       | X       |
| 00:30              | X       | X       | X       | X       |
| 00:35              | X       | X       | X       |         |
| 00:40              | X       | X       | X       | X       |
| 00:45              | X       | X       | X       |         |
| 00:50              | X       | X       | X       | X       |
| 00:55              | X       | X       | X       |         |
| 01:00              | X       | X       | X       | X       |
| 01:05              | X       | X       | X       |         |
| 01:10              | X       | X       | X       |         |
| 01:15              | X       | X       | X       | X       |
| 01:20              | X       | X       | X       |         |
| 01:30              | X       | X       | X       | X       |
| 01:40              | X       | X       | X       |         |
| 01:50              | X       | X       | X       |         |
| 02:00              | X       | X       | X       | X       |
| 02:15              | X       | X       | X       |         |
| 02:30              | X       | X       | X       | X       |
| 02:45              | X       | X       | X       |         |
| 03:00              | X       | X       | X       | X       |
| 03:30              | X       | X       | X       | X       |
| 04:00              | X       | X       | X       | X       |
| 05:00              | X       | X       | X       | X       |
| 06:00              | X       | X       | X       | X       |
| 07:00              | X       | X       | X       | X       |
| 08:00              | X       | X       | X       | X       |
| 10:00              | X       | X       | X       |         |
| 12:00              | X       | X       | X       |         |

<sup>a</sup>Within 5 minutes pre-dose in Trial 1, within 2 minutes pre-dose in Trials 2 and 4 and within 10 minutes pre-dose in Trial 3

**Table S3** Baseline characteristics

| Characteristic                          |      | Clinical pharmacology trials |                        | Phase IIIa trial |
|-----------------------------------------|------|------------------------------|------------------------|------------------|
|                                         |      | Pooled PK <sup>a</sup>       | Pooled PD <sup>b</sup> | Trial 5          |
| Males/females                           | N    | 113/62                       | 82/30                  | 616/424          |
| Age, years                              | Mean | 42                           | 42                     | 45               |
|                                         | Min  | 21                           | 21                     | 18               |
|                                         | Max  | 73                           | 73                     | 83               |
| Body weight, kg                         | Mean | 72.0                         | 71.4                   | 80.0             |
|                                         | Min  | 48.6                         | 48.6                   | 45.3             |
|                                         | Max  | 100.0                        | 97.4                   | 140.0            |
| BMI, kg/m <sup>2</sup>                  | Mean | 23.9                         | 23.7                   | 26.7             |
|                                         | Min  | 18.5                         | 18.5                   | 17.0             |
|                                         | Max  | 28.7                         | 28.7                   | 37.9             |
| Duration of diabetes, years             | Mean | 21                           | 21                     | 20               |
|                                         | Min  | 1                            | 1                      | 1                |
|                                         | Max  | 57                           | 57                     | 65               |
| Baseline HbA <sub>1c</sub> , %          | Mean | 7.3                          | 7.4                    | 7.6              |
|                                         | Min  | 5.2                          | 5.2                    | 5.6              |
|                                         | Max  | 9.2                          | 8.9                    | 9.8              |
| Baseline HbA <sub>1c</sub> , mmol/mol   | Mean | 52                           | 52                     | 59               |
|                                         | Min  | 30                           | 30                     | 38               |
|                                         | Max  | 71                           | 68                     | 84               |
| Anti-IAsp antibodies, %B/T <sup>c</sup> | Mean | 10.79                        | 10.98                  | 18.0             |
|                                         | Min  | -0.11                        | -0.11                  | 0.2              |
|                                         | Max  | 66.94                        | 66.94                  | 86.7             |
| Fasting C-peptide, nmol/L               | Mean | 0.03                         | 0.04                   | ND               |
|                                         | Min  | 0.00                         | 0.01                   | ND               |
|                                         | Max  | 0.30                         | 0.30                   | ND               |

BMI, body mass index; HbA<sub>1c</sub>, glycosylated haemoglobin; IAsp, insulin aspart; Max, maximum; Min, minimum; N, number of subjects; ND, not determined; PK, pharmacokinetics; PD, pharmacodynamics

<sup>a</sup> Trials 1 to 4 (i.e. the 4 clinical pharmacology trials)

<sup>b</sup> Trials 1 to 3 (i.e. those 3 clinical pharmacology trials using glucose clamp to assess pharmacodynamics)

<sup>c</sup> Pre-dose in Trials 1 to 4 and at 26 weeks of treatment in Trial 5

**Table S4** Onset of exposure for faster aspart and insulin aspart after subcutaneous administration in subjects with type 1 diabetes mellitus when using an assay to measure free or total insulin aspart

| Variable                                                          | Free IAsp                   |                 |                                                             |                             | Total IAsp                  |                 |                                                             |                             |
|-------------------------------------------------------------------|-----------------------------|-----------------|-------------------------------------------------------------|-----------------------------|-----------------------------|-----------------|-------------------------------------------------------------|-----------------------------|
|                                                                   | LS mean<br>Faster<br>aspart | LS mean<br>IAsp | Treatment<br>difference<br>Faster aspart - IAsp<br>[95% CI] | <i>p</i> value <sup>a</sup> | LS mean<br>Faster<br>aspart | LS mean<br>IAsp | Treatment<br>difference<br>Faster aspart - IAsp<br>[95% CI] | <i>p</i> value <sup>a</sup> |
| Onset of appearance (min)                                         | 3.4                         | 7.5             | -4.1 [-4.7;-3.6]                                            | <0.001                      | 2.7                         | 5.2             | -2.5 [-2.8;-2.1]                                            | <0.001                      |
| <i>t</i> <sub>Early 50 % C<sub>max</sub></sub> (min) <sup>b</sup> | 17.5                        | 26.2            | -8.8 [-10.0;-7.5]                                           | <0.001                      | 17.8                        | 25.4            | -7.6 [-8.8;-6.4]                                            | <0.001                      |
| <i>t</i> <sub>max</sub> (min)                                     | 55.2                        | 66.0            | -10.8 [-15.4;-6.3]                                          | <0.001                      | 54.2                        | 64.7            | -10.6 [-14.7;-6.5]                                          | <0.001                      |

Results are based on 175 individual pharmacokinetic profiles per treatment

CI, confidence interval; IAsp, insulin aspart; LS mean, least square mean; *t*<sub>Early 50 % C<sub>max</sub></sub>, time to 50% of maximum IAsp concentration in the early part of the pharmacokinetic profile; *t*<sub>max</sub>, time to maximum IAsp concentration

<sup>a</sup> For treatment comparison of faster aspart vs. IAsp

<sup>b</sup> Not determined in Trial 4

**Table S5** Early exposure for faster aspart and insulin aspart after subcutaneous administration in subjects with type 1 diabetes mellitus when using an assay to measure free or total insulin aspart

| Variable                                | Free IAsp                   |                 |                                                   |                             | Total IAsp                  |                 |                                                   |                             |
|-----------------------------------------|-----------------------------|-----------------|---------------------------------------------------|-----------------------------|-----------------------------|-----------------|---------------------------------------------------|-----------------------------|
|                                         | LS mean<br>Faster<br>aspart | LS mean<br>IAsp | Treatment ratio<br>Faster aspart/IAsp<br>[95% CI] | <i>p</i> value <sup>a</sup> | LS mean<br>Faster<br>aspart | LS mean<br>IAsp | Treatment ratio<br>Faster aspart/IAsp<br>[95% CI] | <i>p</i> value <sup>a</sup> |
| AUC <sub>IAsp,0-15 min</sub> (pmol·h/L) | 16.4                        | 4.8             | 3.40 [3.00;3.85]                                  | <0.001                      | 25.9                        | 9.0             | 2.87 [2.58;3.20]                                  | <0.001                      |
| AUC <sub>IAsp,0-30 min</sub> (pmol·h/L) | 67.7                        | 36.0            | 1.88 [1.74;2.04]                                  | <0.001                      | 117.3                       | 66.5            | 1.77 [1.64;1.90]                                  | <0.001                      |
| AUC <sub>IAsp,0-60 min</sub> (pmol·h/L) | 211.1                       | 164.1           | 1.29 [1.22;1.36]                                  | <0.001                      | 372.2                       | 295.0           | 1.26 [1.20;1.33]                                  | <0.001                      |

Results are based on 175 individual pharmacokinetic profiles per treatment. The dose was adjusted to 0.2 U/kg in all subjects

AUC<sub>IAsp,0-x min</sub>, area under the concentration-time curve for IAsp from time zero to x min; CI, confidence interval; IAsp, insulin aspart; LS mean, least square mean

<sup>a</sup> For treatment comparison of faster aspart vs. IAsp

**Table S6** Offset of exposure for faster aspart and insulin aspart after subcutaneous administration in subjects with type 1 diabetes mellitus when using an assay to measure free or total insulin aspart

| Variable                                      | Free IAsp                   |                 |                                                             |                             | Total IAsp                  |                 |                                                             |                             |
|-----------------------------------------------|-----------------------------|-----------------|-------------------------------------------------------------|-----------------------------|-----------------------------|-----------------|-------------------------------------------------------------|-----------------------------|
|                                               | LS mean<br>Faster<br>aspart | LS mean<br>IAsp | Treatment<br>difference<br>Faster aspart - IAsp<br>[95% CI] | <i>p</i> value <sup>a</sup> | LS mean<br>Faster<br>aspart | LS mean<br>IAsp | Treatment<br>difference<br>Faster aspart - IAsp<br>[95% CI] | <i>p</i> value <sup>a</sup> |
| $t_{\text{Late 50 \% } C_{\text{max}}}$ (min) | 143                         | 157             | -13.8 [-20.0;-7.6]                                          | <0.001                      | 140                         | 154             | -14.0 [-20.1;-7.9]                                          | <0.001                      |

  

| Variable                           | Free IAsp                   |                 |                                                      |                             | Total IAsp                  |                 |                                                      |                             |
|------------------------------------|-----------------------------|-----------------|------------------------------------------------------|-----------------------------|-----------------------------|-----------------|------------------------------------------------------|-----------------------------|
|                                    | LS mean<br>Faster<br>aspart | LS mean<br>IAsp | Treatment<br>ratio<br>Faster aspart/IAsp<br>[95% CI] | <i>p</i> value <sup>a</sup> | LS mean<br>Faster<br>aspart | LS mean<br>IAsp | Treatment<br>ratio<br>Faster aspart/IAsp<br>[95% CI] | <i>p</i> value <sup>a</sup> |
| $AUC_{\text{IAsp},2-t}$ (pmol·h/L) | 232                         | 262             | 0.88 [0.81;0.96]                                     | 0.005                       | 428                         | 479             | 0.89 [0.84;0.96]                                     | 0.001                       |

Results are based on 175 individual pharmacokinetic profiles per treatment. For  $AUC_{\text{IAsp},2-t}$ , the dose was adjusted to 0.2 U/kg in all subjects.  $AUC_{\text{IAsp},2-t}$ , area under the concentration-time curve for IAsp from 2 h; CI, confidence interval; IAsp, insulin aspart; LS mean, least square mean;  $t_{\text{Late 50 \% } C_{\text{max}}}$ , time to 50% of maximum IAsp concentration in the late part of the pharmacokinetic profile

<sup>a</sup> For treatment comparison of faster aspart vs. IAsp

**Table S7** Overall exposure for faster aspart and insulin aspart after subcutaneous administration in subjects with type 1 diabetes mellitus when using an assay to measure free or total insulin aspart

| Variable                           | Free IAsp                   |                 |                                                   |                             | Total IAsp                  |                 |                                                   |                             |
|------------------------------------|-----------------------------|-----------------|---------------------------------------------------|-----------------------------|-----------------------------|-----------------|---------------------------------------------------|-----------------------------|
|                                    | LS mean<br>Faster<br>aspart | LS mean<br>IAsp | Treatment ratio<br>Faster aspart/IAsp<br>[95% CI] | <i>p</i> value <sup>a</sup> | LS mean<br>Faster<br>aspart | LS mean<br>IAsp | Treatment ratio<br>Faster aspart/IAsp<br>[95% CI] | <i>p</i> value <sup>a</sup> |
| AUC <sub>IAsp,0-t</sub> (pmol·h/L) | 719.5                       | 720.1           | 1.00 [0.97;1.03]                                  | 0.962                       | 1292.7                      | 1285.9          | 1.01 [0.97;1.04]                                  | 0.760                       |
| C <sub>max,IAsp</sub> (pmol/L)     | 330.8                       | 318.2           | 1.04 [0.99;1.09]                                  | 0.092                       | 572.9                       | 553.1           | 1.04 [0.99;1.08]                                  | 0.101                       |

Results are based on 175 individual pharmacokinetic profiles per treatment. The dose was adjusted to 0.2 U/kg in all subjects  
AUC<sub>IAsp,0-t</sub>, total area under the concentration-time curve for IAsp; CI, confidence interval; C<sub>max</sub>, maximum IAsp concentration; IAsp, insulin aspart; LS mean, least square mean

<sup>a</sup> For treatment comparison of faster aspart vs. IAsp



## Prediction of $AUC_{IAsp,0-t}$ in the phase IIIa trial

In the phase IIIa trial (Trial 5),  $AUC_{IAsp,0-t}$  was predicted from the two IAsp concentration measurements done 1 and 2 hours post-dose at 26 weeks of treatment ( $C_1$  and  $C_2$ , respectively). The prediction was based on data from available clinical pharmacology trials with faster aspart and IAsp (101 pharmacokinetic profiles to predict free IAsp for mealtime dosing arms, 600 pharmacokinetic profiles to predict free IAsp for post-meal dosing arms and 189 pharmacokinetic profiles to predict total IAsp). The prediction was done using multiple linear regression without intercept for the relationship between IAsp concentrations at 1 and 2 hours post-dose and  $AUC_{IAsp,0-t}$ . The equations used to predict  $AUC_{IAsp,0-t}$  are shown in Table S8.  $R^2$  (i.e. the fraction of variation explained by the linear model) was between 0.51 and 0.84 for the different predictions.

**Table S8** Equations used for the prediction of  $AUC_{IAsp,0-t}$  in the phase IIIa trial

|                                   | Free IAsp                         |                                                | Total IAsp                         |                                                |
|-----------------------------------|-----------------------------------|------------------------------------------------|------------------------------------|------------------------------------------------|
|                                   | Both measurements available       | Only 2-hour measurement available <sup>a</sup> | Both measurements available        | Only 2-hour measurement available <sup>a</sup> |
| Mealtime dosing arms <sup>b</sup> | $0.66 \cdot C_1 + 2.67 \cdot C_2$ | $3.55 \cdot C_2$                               | $0.54 \cdot C_1 + 3.08 \cdot C_2$  | $3.77 \cdot C_2$                               |
| Post-meal dosing arm <sup>c</sup> | $0.38 \cdot C_1 + 2.58 \cdot C_2$ | $3.00 \cdot C_2$                               | $0.014 \cdot C_1 + 3.31 \cdot C_2$ | $3.33 \cdot C_2$                               |

AUC, area under the curve;  $C_1$  and  $C_2$ , free or total insulin aspart concentrations at 1 and 2 hours post-dose; IAsp, insulin aspart

<sup>a</sup> If only the 1-hour measurement was available  $AUC_{IAsp,0-t}$  was not predicted

<sup>b</sup> Both faster aspart and IAsp

<sup>c</sup> The actual time points of insulin aspart measurement were 40 minutes post-dose for  $C_1$  and 100 minutes post-dose for  $C_2$

## References

1. Heise T, Hövelmann U, Brøndsted L et al. Faster-acting insulin aspart: earlier onset of appearance and greater early pharmacokinetic and pharmacodynamic effects than insulin aspart. *Diabetes Obes Metab.* 2015;17:682-8.
2. Heise T, Hövelmann U, Zijlstra E et al. A comparison of pharmacokinetic and pharmacodynamic properties between faster-acting insulin aspart and insulin aspart in elderly subjects with type 1 diabetes mellitus. *Drugs Aging.* 2017;34:29-38.
3. Shiramoto M, Nishida T, Hansen AK, Haahr H. Fast-acting insulin aspart in Japanese patients with type 1 diabetes: Faster onset, higher early exposure and greater early glucose-lowering effect relative to insulin aspart. *J Diabetes Investig.* 2018;9:303-10.
4. Basu A, Pieber TR, Hansen AK et al. Greater early postprandial suppression of endogenous glucose production and higher initial glucose disappearance is achieved with fast-acting insulin aspart compared with insulin aspart. *Diabetes Obes Metab.* 2018;20:1615-22.
5. Russell-Jones D, Bode BW, De Block C et al. Fast-acting insulin aspart improves glycemic control in basal-bolus treatment for type 1 diabetes: results of a 26-week multicenter, active-controlled, treat-to-target, randomized, parallel-group trial (Onset 1). *Diabetes Care.* 2017;40:943-50.
